# Supplementary material for: Designing and fabricating double resonance substrate with metallic nanoparticles–metallic grating coupling system for highly intensified surface-enhanced Raman spectroscopy
Source: Royal Society of Chemistry journal article supplement (doi:10.1039/c4an00540f), 2014-01-01
Supplement: c4an00540f1.pdf [file c4an00540f1.pdf]

## Supporting information:

### Designing and Fabricating of Double Resonance Substrate with Metallic Nanoparticles-Metallic Grating Coupling System for Highly Intensified Surface-Enhanced Raman Spectroscopy

Ying Zhou,<sup>a,b</sup> Xuanhua Li,<sup>a</sup> Xingang Ren,<sup>c</sup> Liangbao Yang,<sup>a,b</sup> and Jinhuai Liu<sup>a</sup>

#### Gap size distribution

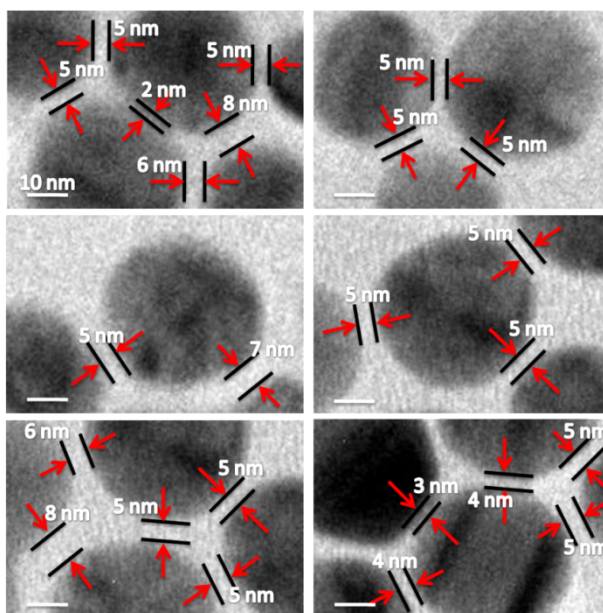

**Fig. S1** Typical higher-magnification TEM images and the specific measurements of Au NPs gap distance distribution of interparticle separations.
